# Supplementary material for: A New Method for Discovering Plant Biostimulants
Source: MDPI journal article supplement (doi:10.3390/plants13010056), 2023-12-23
Supplement: s1 [file s1]

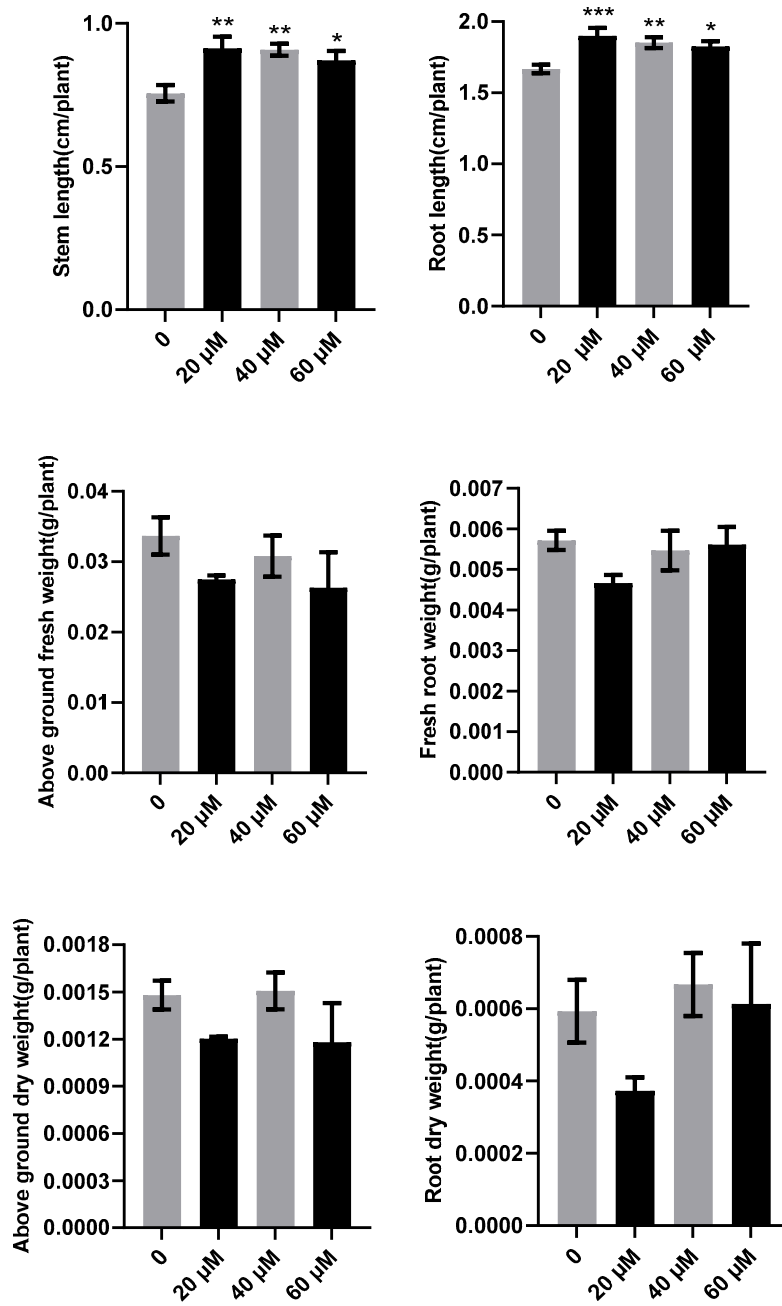

**Figure S1.** Concentration screening of vanillic acid for promoting plant growth. When the concentration of vanillic acid was 20  $\mu\text{mol/L}$ , the root length of seedlings significantly increased, indicating that vanillic acid had a promoting effect on plant growth at 20  $\mu\text{mol/L}$ . \*\*\*  $P < 0.001$ , \*\*  $P < 0.01$ , \*  $P < 0.05$ .

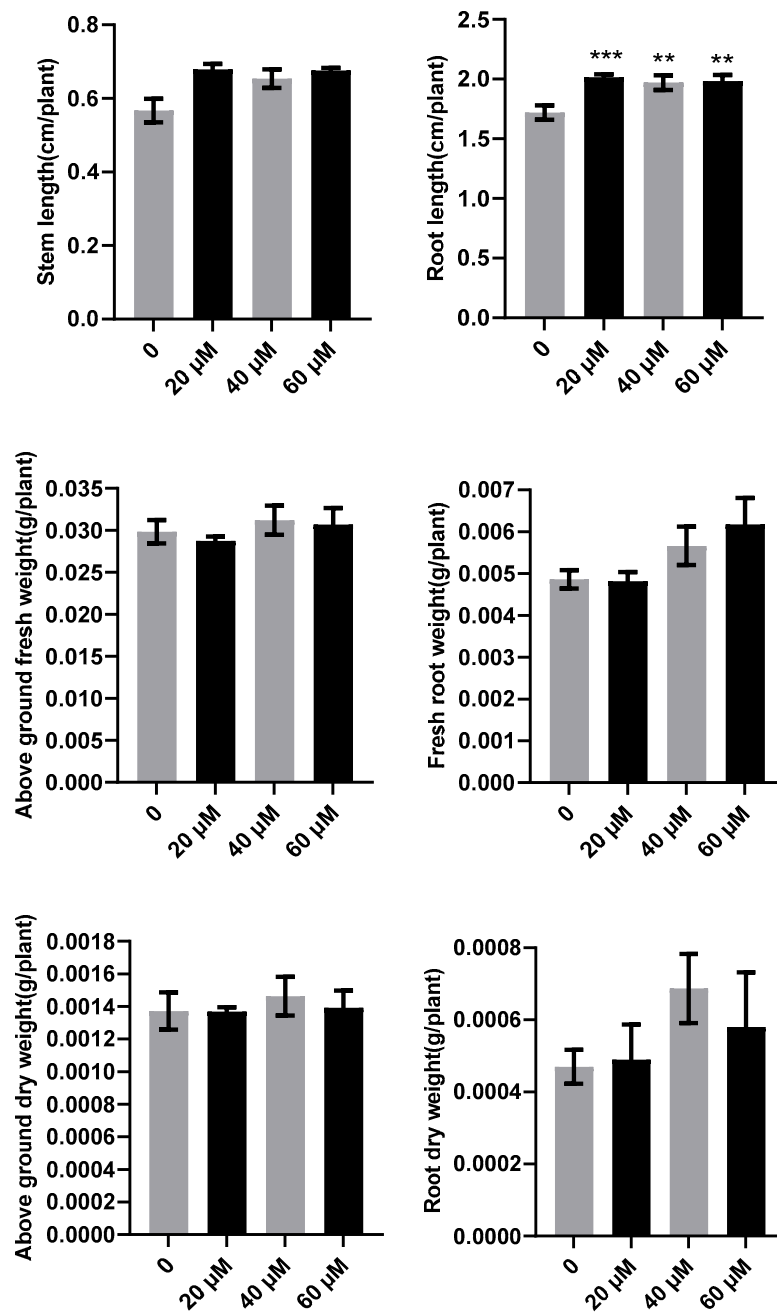

**Figure S2.** Concentration screening of p-coumaric acid for promoting plant growth. The root length of seedlings significantly increased when the concentration of p-coumaric acid was 20  $\mu\text{mol/L}$ , indicating that p-coumaric acid had a promoting effect on plant growth at 20  $\mu\text{mol/L}$ . \*\*  $P < 0.01$ .

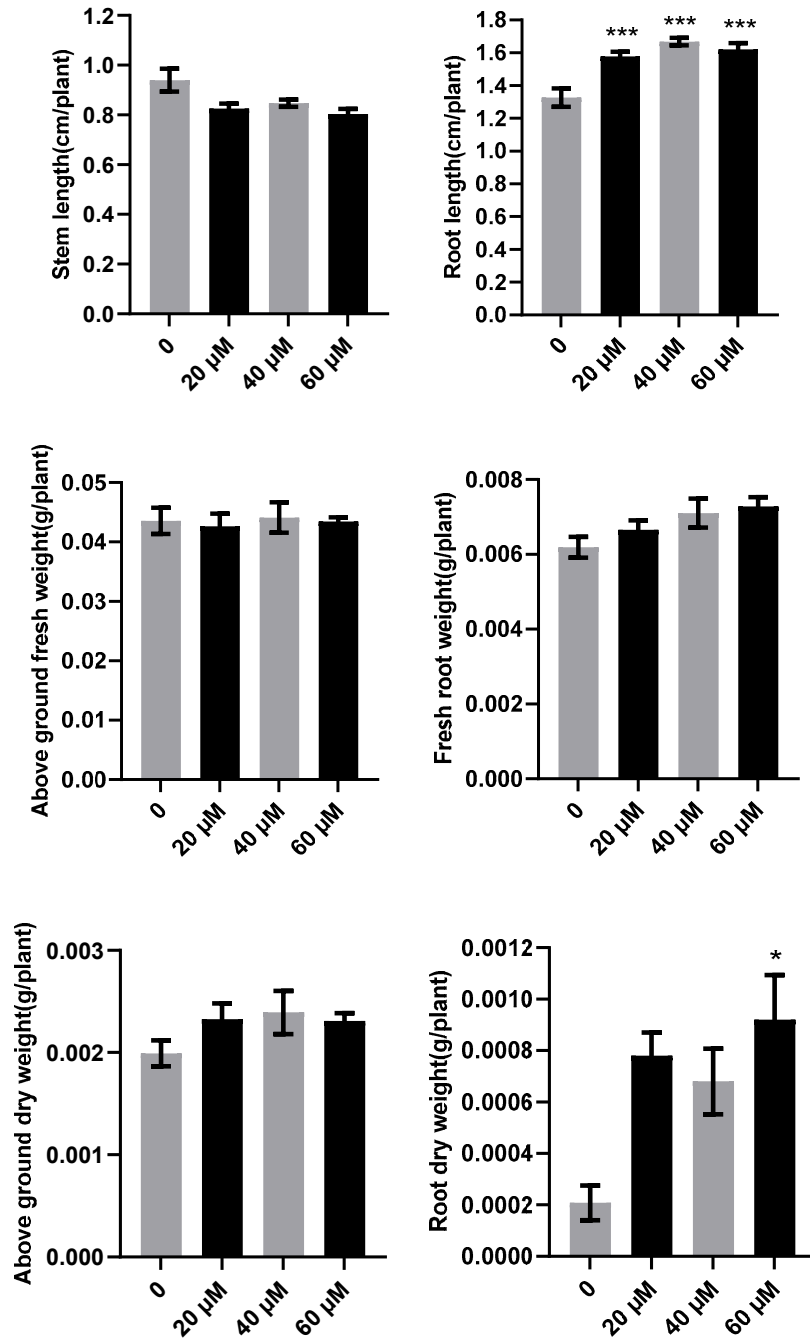

**Figure S3.** Concentration screening of piperic acid for promoting plant growth. Piperic acid at 20  $\mu\text{mol/L}$ -60  $\mu\text{mol/L}$  significantly increased the root length of seedlings, and 60  $\mu\text{mol/L}$  significantly increased the root dry weight of seedlings, indicating that piperic acid at 20  $\mu\text{mol/L}$ -60  $\mu\text{mol/L}$  significantly promoted plant growth. The effect was more obvious at 60  $\mu\text{mol/L}$ . \*\*\*  $P < 0.001$ , \*  $P < 0.05$ .

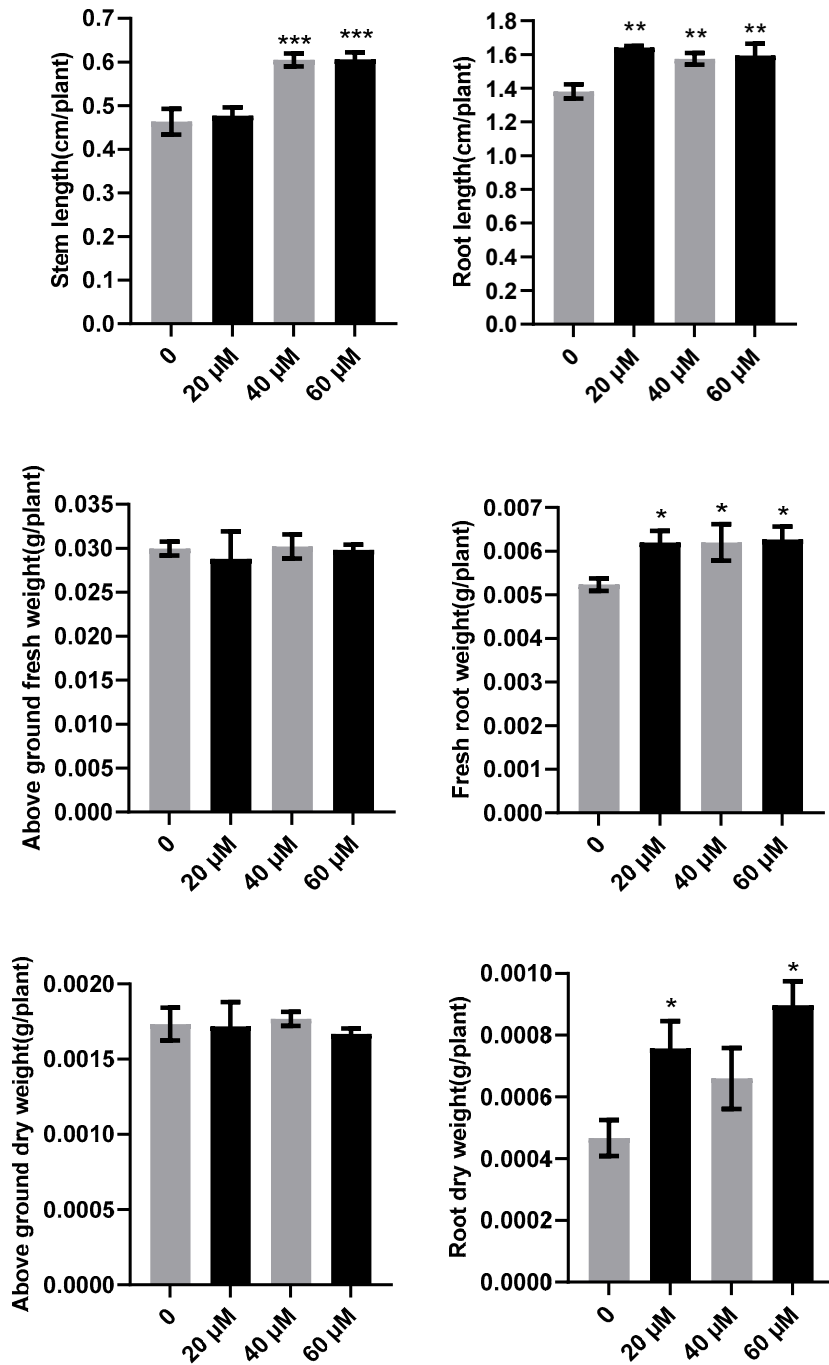

**Figure S4.** Concentration screening of catechol for promoting plant growth. The root length, fresh root weight and dry root weight of the seedlings at 20  $\mu\text{mol/L}$  and 60  $\mu\text{mol/L}$  were significantly higher than those of the control group. The root length significantly increased at 40  $\mu\text{mol/L}$ , and the stem length significantly increased at 60  $\mu\text{mol/L}$ . These results indicate that catechol can significantly promote plant growth when the concentration is 20  $\mu\text{mol/L}$ -60  $\mu\text{mol/L}$ . \*\*\*  $P < 0.001$ , \*\*  $P < 0.01$ , \*  $P < 0.05$ .

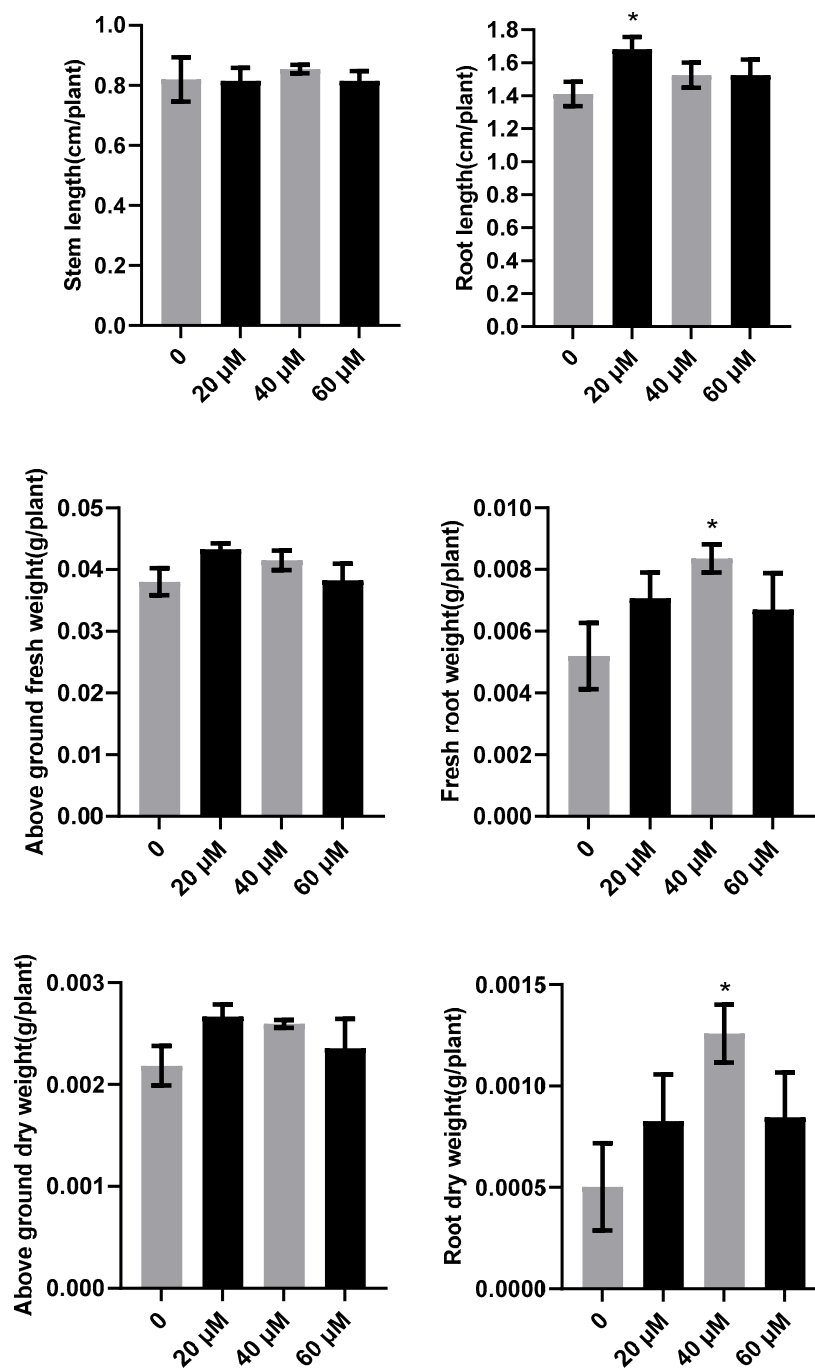

**Figure S5.** Concentration screening of hydroquinone for promoting plant growth. Hydroquinone at 20  $\mu\text{mol/L}$  significantly increased the root length of seedlings, and 40  $\mu\text{mol/L}$  significantly increased the fresh root weight and dry root weight of seedlings, indicating that hydroquinone at 20  $\mu\text{mol/L}$  and 40  $\mu\text{mol/L}$  significantly promoted the growth of plants. \*  $P < 0.05$ .

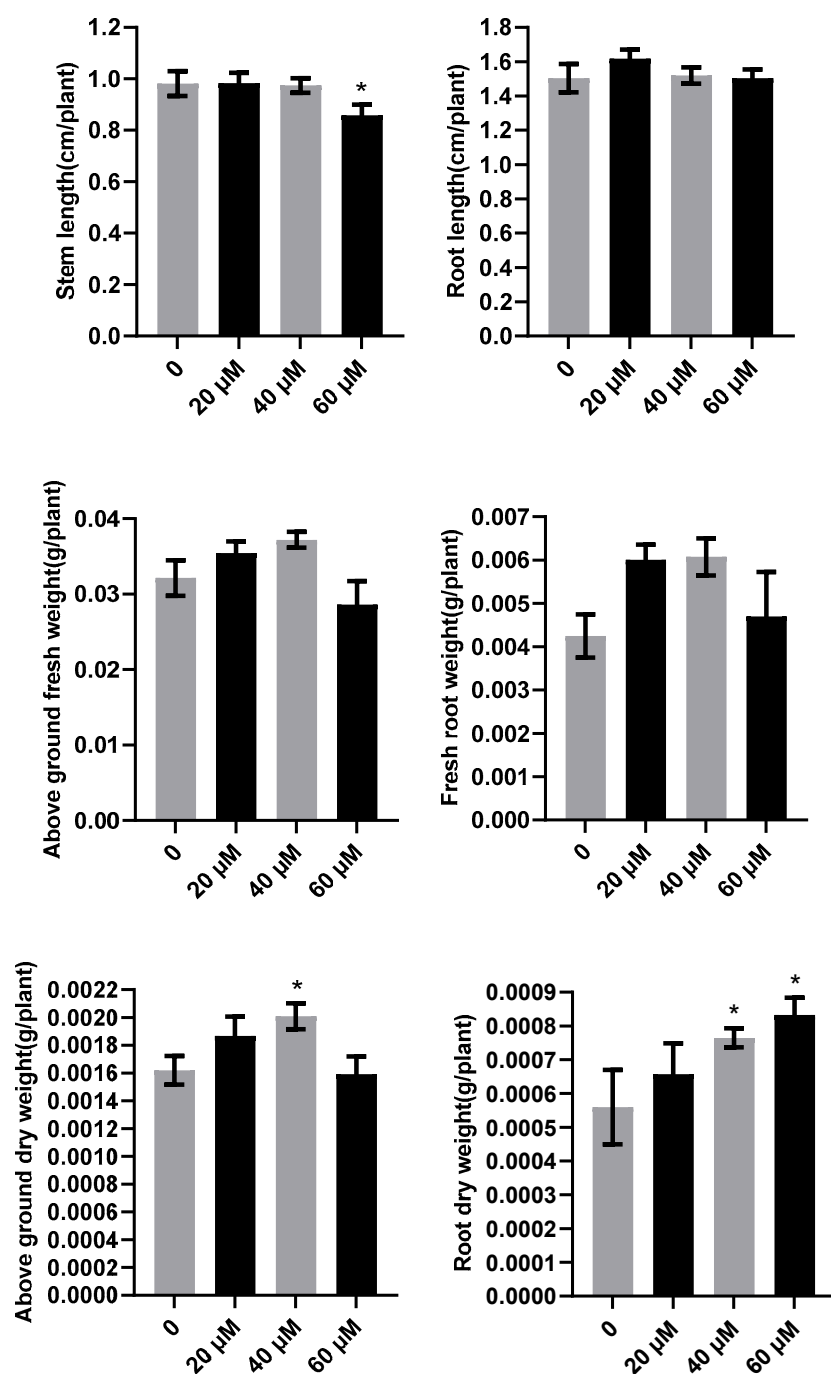

**Figure S6.** Concentration screening of p-hydroxybenzoic acid for promoting plant growth. P-hydroxybenzoic acid significantly increased the stem length of seedlings at 20  $\mu\text{mol/L}$  and 40  $\mu\text{mol/L}$ , significantly increased the root dry weight of seedlings at 40  $\mu\text{mol/L}$  and 60  $\mu\text{mol/L}$ , and significantly increased the aboveground dry weight of seedlings at 40  $\mu\text{mol/L}$  but decreased the stem length at 60  $\mu\text{mol/L}$ . These results indicate that p-hydroxybenzoic acid can significantly promote plant growth at 20  $\mu\text{mol/L}$  and 40  $\mu\text{mol/L}$ , and the effect is most obvious at 40  $\mu\text{mol/L}$ . \*  $P < 0.05$ .
